# Supplementary material for: Development of an ultra fast online-solid phase extraction (SPE) liquid chromatography electrospray tandem mass spectrometry (LC-ESI-MS/MS) based approach for the determination of drugs in pharmacokinetic studies
Source: Royal Society of Chemistry journal article supplement (doi:10.1039/c0ay00714e), 2010-12-22
Supplement: c0ay00714e.pdf [file c0ay00714e.pdf]

**Supplementary Figure I:** Break through test of the SPE column. 20  $\mu\text{l}$  of 100 nM standard solution ( 25 % ACN, 2.5 % HAc) were injected in the loading flow 1250  $\mu\text{l}/\text{min}$  of 100 % water containing 0.1 % HAc and the eluent of the SPE was monitored by ESI(-)-MS/MS. After 5 minutes the eluent was changed in 0.2 min to 100 % ACN in order to elute the loaded analytes. The SRM signal of DCF is shown.

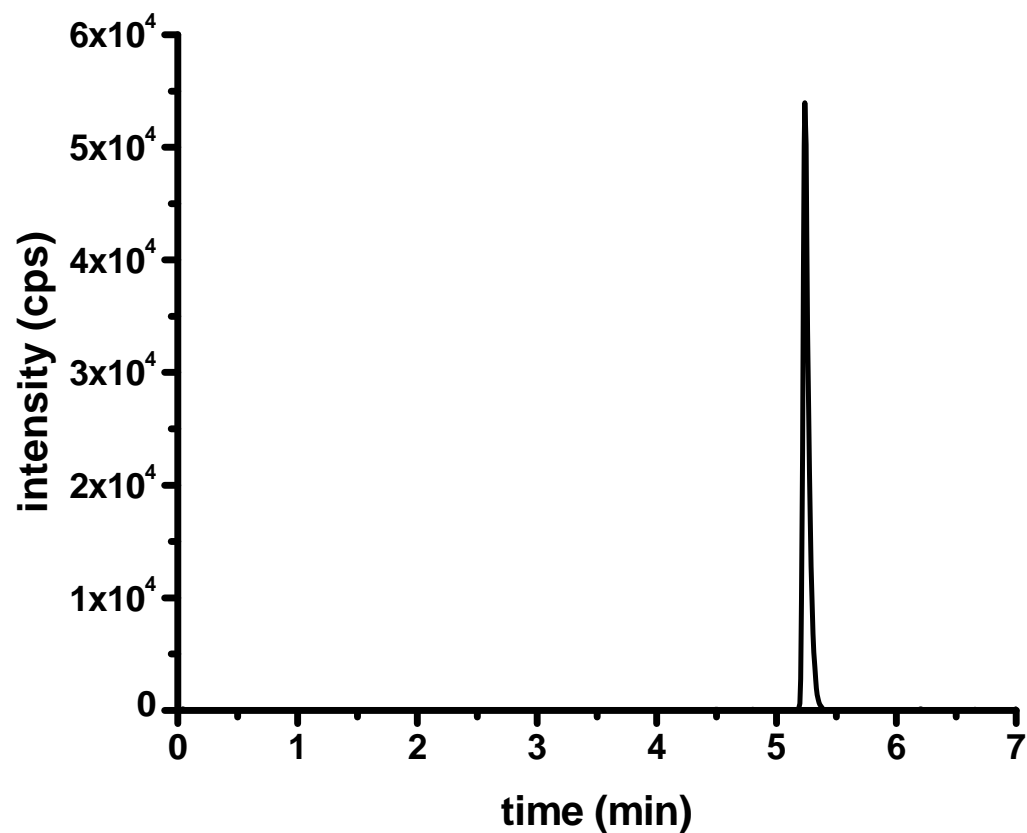

**Supplementary Figure II:** Elution profile from SPE column. The separation column was removed from the setup (Fig.2) and the eluent of the SPE was directly monitored by ESI(-)-MS/MS. The SRM signal of DCF an injection (20  $\mu$ l) of a 10 nM standard solution is shown.

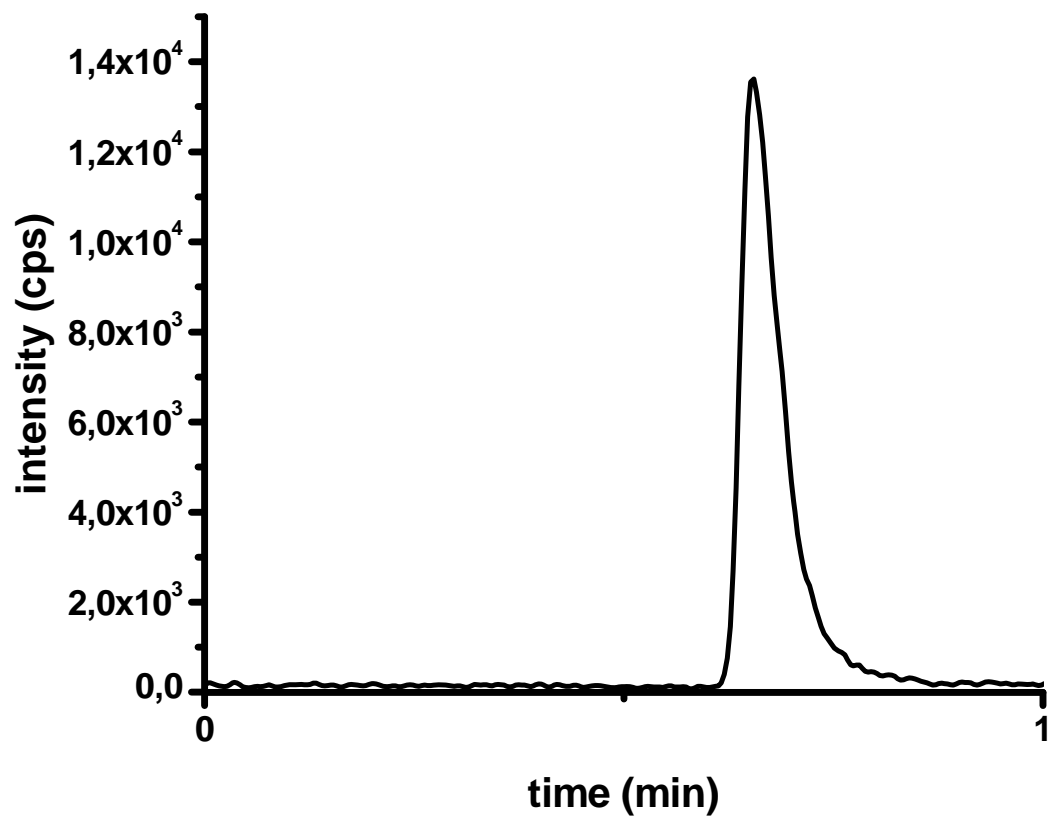

**Supplementary Figure III:** PK profile of sEHi b in whole blood. The PK profile of sEHi b (Figure 7) as investigated after i.p. dosing (10 mg/kg BW) in three rats. The curves for each individual animal are displayed. Error bars represent SD of three injections.

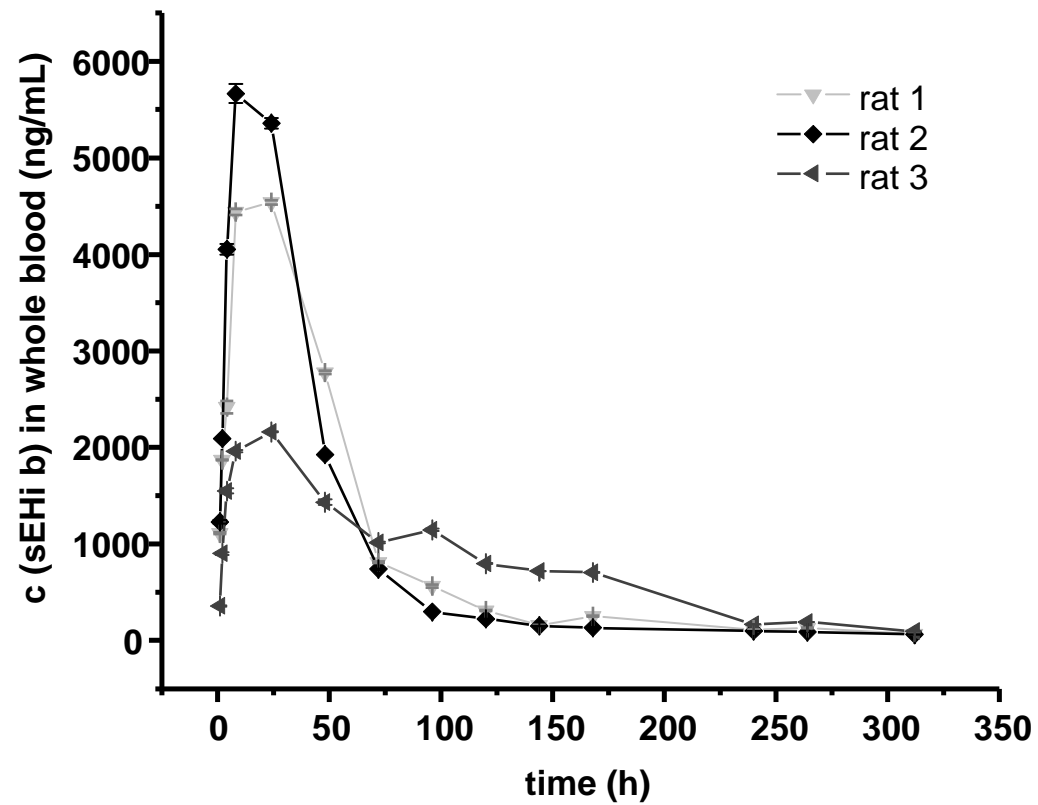

**Supplementary Table I:** Gradients and flow rates of gradient pump 1 and pump 2 and time points the valve is switched.

| <b>time (min)</b> | <b><i>Pump 1</i><br/>flow rate (µL/min)</b> | <b>% B</b>                 |             |                          |
|-------------------|---------------------------------------------|----------------------------|-------------|--------------------------|
| 0                 | 1250                                        | 0                          |             |                          |
| 0.48              | 1250                                        | 0                          |             |                          |
| 0.49              | 300                                         | 0                          |             |                          |
| 0.5               | 300                                         | 0                          |             |                          |
| 0.51              | 1250                                        | 100                        |             |                          |
| 1.5               | 1250                                        | 100                        |             |                          |
| 1.51              | 1250                                        | 0                          |             |                          |
| 2.1               | 1250                                        | 0                          |             |                          |
| <b>time (min)</b> | <b><i>Pump 2</i><br/>flow rate (µL/min)</b> | <b>% B</b>                 |             |                          |
| 0                 | 300                                         | 50                         |             |                          |
| 0.5               | 300                                         | 50                         |             |                          |
| 1.6               | 300                                         | 60                         |             |                          |
| 1.85              | 300                                         | 100                        |             |                          |
| 2.05              | 300                                         | 100                        |             |                          |
| 2.06              | 300                                         | 50                         |             |                          |
| 2.1               | 300                                         | 50                         |             |                          |
| <b>time (min)</b> | <b><i>Six Port Valve</i><br/>position</b>   | <b>SPE column</b>          | <b>mode</b> | <b>separation column</b> |
| 0-0.5             | A                                           | loading                    |             | equilibrating            |
| 0.5-1             | B                                           | transferring               |             | transferring             |
| 1.0-2.1           | A                                           | cleaning/<br>equilibrating |             | eluting/<br>cleaning     |

**Supplementary Table II:** Application of the method on Rofecoxib and several sEHi (Fig. 7 displays the structures of the sEHi a-g). The mean the recovery rate of 3 independent spiked whole blood samples and RSD of the analysis (inter sample variation) is shown. Intra sample variation is represented by the mean of the RSD of three injections of the same sample.

| compound | recovery rate (%)<br>/spiked concentration | intra sample RSD<br>(%) | inter sample RSD<br>(%) |
|----------|--------------------------------------------|-------------------------|-------------------------|
| ROF      | 95.11 / 10 nM                              | 12.8                    | 7.58                    |
|          | 97.23 / 30 nM                              | 5.89                    | 8.15                    |
|          | 100.1 / 100 nM                             | 6.63                    | 8.49                    |
| sEHi a   | 99.00 / 10 nM                              | 3.95                    | 3.20                    |
|          | 99.93 / 30 nM                              | 3.11                    | 4.83                    |
|          | 107.9 / 100 nM                             | 1.83                    | 2.72                    |
| sEHi c   | 95.80 / 10 nM                              | 4.16                    | 8.65                    |
|          | 101.2 / 30 nM                              | 11.1                    | 3.79                    |
|          | 105.8 / 100 nM                             | 2.21                    | 3.05                    |
| sEHi d   | 100.5 / 10 nM                              | 6.43                    | 3.69                    |
|          | 100.0 / 30 nM                              | 2.35                    | 5.02                    |
|          | 102.1 / 100 nM                             | 4.09                    | 1.82                    |
| sEHi e   | 96.19 / 10 nM                              | 5.03                    | 6.06                    |
|          | 106.6 / 30 nM                              | 3.54                    | 4.39                    |
|          | 99.60 / 100 nM                             | 6.68                    | 6.88                    |
